# Supplementary material for: Comparative Study of Intestinal Microbiota Composition of Six Edible Fish Species
Source: PubMed Central journal article supplement (PMC8689067; doi:10.3389/fmicb.2021.760266), 2021-12-07
Supplement: Data_Sheet_1.pdf [file Data_Sheet_1.pdf]

## Supplementary Tables

**Supplementary Table 1.** The details for the different fish species that were sampled in the current study (sampling season, average weight, and number of sampled fish).

| <b>Fish species &amp; size</b> | <b>n</b> | <b>Sampling season</b> | <b>Average weight (gr)</b> |
|--------------------------------|----------|------------------------|----------------------------|
| Hybrid tilapia (small)         | 5        | winter, spring         | 50                         |
| Hybrid tilapia (big)           | 10       | summer, winter, spring | 446                        |
| Flathead grey mullet (small)   | 9        | winter, spring         | 40                         |
| Flathead grey mullet (big)     | 8        | winter, spring         | 446                        |
| Hybrid striped bass (small)    | 4        | winter, summer         | 46                         |
| Hybrid striped bass (big)      | 13       | summer, winter, spring | 603                        |
| Common carp (small)            | 3        | summer                 | 35                         |
| Common carp (big)              | 10       | spring, summer         | 558                        |
| European bass (big)            | 10       | autumn, winter, summer | 162                        |
| Red drum (big)                 | 9        | autumn, winter, summer | 487                        |

**Supplementary Table 2.** Fish feed values for each fish species. Fish feed manufactured by Zemach Extrufeed Aqua (<https://zemach-extrufeed.co.il>) and/or Raanan Fish Feed (<https://raanan-fishfeed.com>).

| <b>Fish<br/>Feed values</b> | <b>European<br/>bass (%)</b> | <b>Hybrid<br/>striped<br/>bass (%)</b> | <b>Red<br/>drum<br/>(%)</b> | <b>Common<br/>carp (%)</b> | <b>Hybrid<br/>tilapia<br/>(%)</b> | <b>Flathead<br/>grey<br/>mullet*</b> |
|-----------------------------|------------------------------|----------------------------------------|-----------------------------|----------------------------|-----------------------------------|--------------------------------------|
| Crude protein               | 46.0                         | 40.0                                   | 45.0                        | 25.0 - 35.0                | 30.0 - 35.0                       | NA**                                 |
| Crude fat                   | 18.0                         | 9.0                                    | 12.0                        | 7.0 - 8.0                  | 4.0 - 6.0                         | NA                                   |
| Crude fiber                 | 3.5                          | 5.0                                    | 3.5                         | 4.5 - 5.0                  | 5.0 - 5.5                         | NA                                   |
| Ash                         | 10.0                         | 8.5                                    | 9.0                         | 8.5 - 9.0                  | 7.0 - 9.0                         | NA                                   |
| Moisture                    | 10.0                         | 9.5                                    | 9.5                         | 9.5 - 10.0                 | 9.5 - 10.0                        | NA                                   |
| Calcium                     | 2.0                          | 2.2                                    | 2.0                         | 1.80                       | 1.2 - 1.7                         | NA                                   |
| Phosphorus                  | 1.0 - 1.5                    | 1.0                                    | 1.0                         | 0.8 - 1.3                  | 1 - 1.2                           | NA                                   |

\*Flathead grey mullet do not have special feed, they are only raised in polyculture and eat the feed of the primary fish in the pond/reservoir (usually hybrid tilapia, common carp or hybrid striped bass).

\*\*NA, not available

**Supplementary Table 3.** Pairwise ADONIS test with Benjamini-Hochberg correction for false discovery rate test based on fish species and size.

| Species                                                      | df | F     | R <sup>2</sup> | p     | adjusted p (BH*) |
|--------------------------------------------------------------|----|-------|----------------|-------|------------------|
| <b>Fish size (small fish &lt;100g vs. big fish &gt;100g)</b> |    |       |                |       |                  |
| Hybrid striped bass                                          | 1  | 1.91  | 0.113          | 0.045 | 0.058            |
| Common carp                                                  | 1  | 5.10  | 0.317          | 0.023 | 0.033            |
| Flathead grey mullet                                         | 1  | 1.07  | 0.067          | 0.374 | 0.382            |
| Hybrid tilapia                                               | 1  | 8.20  | 0.387          | 0.001 | 0.002            |
| <b>Fish species (small fish &lt;100g)</b>                    |    |       |                |       |                  |
| Hybrid striped bass vs. Common carp                          | 1  | 1.36  | 0.254          | 0.266 | 0.279            |
| Hybrid striped bass vs. Flathead grey mullet                 | 1  | 2.79  | 0.202          | 0.006 | 0.001            |
| Hybrid striped bass vs. Hybrid tilapia                       | 1  | 6.82  | 0.494          | 0.005 | 0.008            |
| Common carp vs. Flathead grey mullet                         | 1  | 1.52  | 0.144          | 0.074 | 0.088            |
| Common carp vs. Hybrid tilapia                               | 1  | 4.72  | 0.486          | 0.042 | 0.055            |
| Flathead grey mullet vs. Hybrid tilapia                      | 1  | 4.98  | 0.293          | 0.003 | 0.005            |
| <b>Fish size (small fish &lt;100g vs. big fish &gt;100g)</b> |    |       |                |       |                  |
| Hybrid striped bass vs. Common carp                          | 1  | 4.42  | 0.167          | 0.001 | 0.002            |
| Hybrid striped bass vs. European bass                        | 1  | 1.99  | 0.086          | 0.025 | 0.035            |
| Hybrid striped bass vs. Flathead grey mullet                 | 1  | 2.34  | 0.110          | 0.001 | 0.002            |
| Hybrid striped bass vs. Red drum                             | 1  | 3.12  | 0.135          | 0.003 | 0.005            |
| Hybrid striped bass vs. Hybrid tilapia                       | 1  | 4.38  | 0.173          | 0.002 | 0.004            |
| Common carp vs. European bass                                | 1  | 4.99  | 0.208          | 0.001 | 0.002            |
| Common carp vs. Flathead grey mullet                         | 1  | 9.58  | 0.360          | 0.001 | 0.002            |
| Common carp vs. Red drum                                     | 1  | 6.27  | 0.258          | 0.001 | 0.002            |
| Common carp vs. Hybrid tilapia                               | 1  | 10.08 | 0.346          | 0.001 | 0.002            |
| European bass vs. Flathead grey mullet                       | 1  | 2.80  | 0.149          | 0.001 | 0.002            |
| European bass vs. Red drum                                   | 1  | 1.97  | 0.104          | 0.035 | 0.048            |
| European bass vs. Hybrid tilapia                             | 1  | 3.54  | 0.164          | 0.002 | 0.004            |
| Flathead grey mullet vs. Red drum                            | 1  | 3.99  | 0.210          | 0.001 | 0.002            |
| Flathead grey mullet vs. Hybrid tilapia                      | 1  | 4.21  | 0.208          | 0.001 | 0.002            |
| Red drum vs. Hybrid tilapia                                  | 1  | 1.65  | 0.088          | 0.099 | 0.111            |

\*BH, Benjamini-Hochberg correction

**Supplementary Table 4.** (Presented in an Excel file) **ASV taxonomic classification and abundances within each sample of each fish species.** The Table includes ASVs with the abundances above 100 per ASV.

BSC, hybrid striped bass; CC, common carp; LC, European bass; MC, flathead grey mullet; RDC, red drum; TC, hybrid tilapia.
